# Supplementary material
Source: PubMed Central journal article supplement (PMC3314195)
Supplement: NIHMS47407-supplement-supp_data.pdf [file NIHMS47407-supplement-supp_data.pdf]

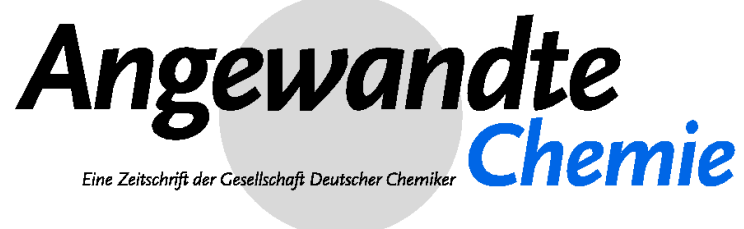

Supporting Information

© Wiley-VCH 2005

69451 Weinheim, Germany

## The fluorinase from *Streptomyces cattleya* is also a chlorinase

Hai Deng, Steven L. Cobb, Andrew McEwan, Ryan P. McGlinchey, James H. Naismith, David O'Hagan\*, David A Robinson and Jonathan B Spencer

### Materials

L-Se-methionine, L-methionine, L-[<sup>13</sup>C-*methyl*]-methionine and SAM were purchased from the Sigma Chem. Co. Ltd, UK. 5'-fluoro-5'-deoxyadenosine (5'-FDA) (*Angew Chemie Int. Ed., English*, 2002, **41**, 3193-3195) and the recombinant fluorinase (*Nature*, 2004, **427**, 561 – 565) were prepared as previously described.

### The fluorinase assay

Enzymatic activity was assayed at 25°C, monitoring 5'-FDA consumptions using a Varian HPLC system (Varian 325 UV-Vis Detector, 400 Autosampler, 230 Solvent delivery module, 800 interface box, 350 reflective index). For the kinetic studies of the reverse reaction, recombinant fluorination enzyme ( $1.9 \times 10^{-4}$  unit, unit =  $\mu\text{mol}/\text{min}$ ) was incubated at 37°C with 5'-FDA (2 mM) and L-methionine (20 mM) in phosphate buffer (20mM, pH=7.8), at a final volume of 0.2 mL. The kinetic parameters for L-methionine ( $K_m = 4.5$  mM,  $V_{\text{max}} = 0.74$  nmol 5'-FDA consumption/mg protein/min) and 5'-FDA ( $K_m = 0.14$  mM) were evaluated for both substrates. For substrate specificity, fluorinase ( $1.9 \times 10^{-4}$  unit) was incubated at 37°C with SAM (1 mM) and fluoride or chloride ion (20 mM) in phosphate buffer (20 mM, pH = 7.8), at a final volume of 0.2 ml.

Samples for HPLC analysis were boiled at 95 °C (3 min) and the precipitated protein removed by centrifugation. An aliquot (20  $\mu\text{L}$ ) of the clear supernatant was used for HPLC analysis on a Hypersil 5  $\mu\text{M}$  C-18 column (250x4.6 mm, Macherey-Nagel) equilibrated with  $\text{KH}_2\text{PO}_4$  (50 mM) and acetonitrile (95:5 v/v). Runs were monitored by UV at 260 nm by gradient elution from a starting mobile phase of  $\text{KH}_2\text{PO}_4$  (50 mM) and acetonitrile (95:5 v/v) to a final mobile phase consisting of  $\text{KH}_2\text{PO}_4$  (50 mM) and acetonitrile (80:20 v/v). Samples were introduced through a Varian 400 Autosampler fitted with a 20- $\mu\text{L}$  loop and the flow rate was maintained at 1.0 mL/min with a total time of elution of 20 min. The concentration of 5'-FDA was determined against a standard curve derived using synthetic 5'-FDA.

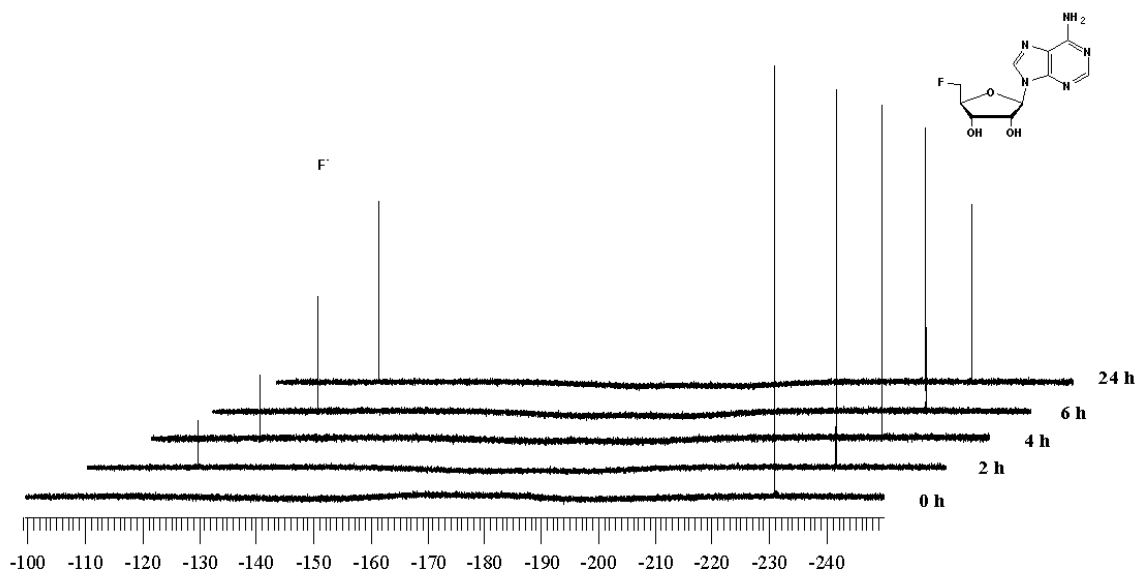

**Figure 1** The fluorinase operating in reverse.  $^{19}\text{F}\{^1\text{H}\}$ -NMR (500MHz) study monitoring the course of the conversion of 5'-FDA ( $\delta = -230.87$  ppm) and L-methionine to generate  $\text{F}^-$  ( $\delta = -120.0$  ppm) and SAM. 5'-FDA (2 mM) and L-methionine (20mM) were incubated with the fluorinase ( $2.3 \times 10^{-2}$  unit) in a phosphate buffer (20 mM) at pH 7.8.

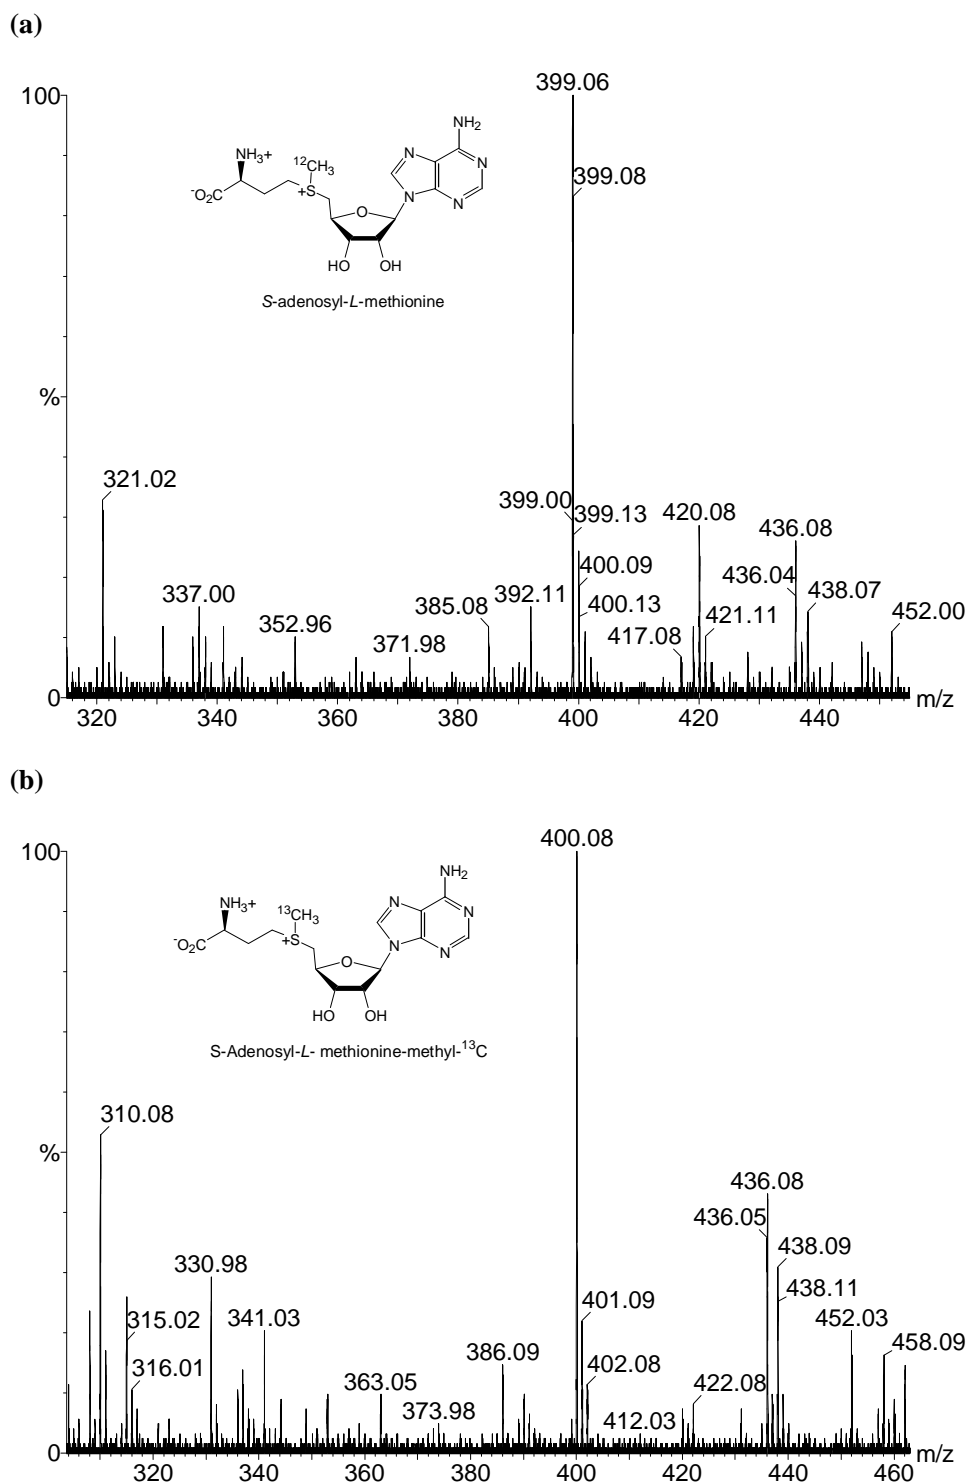

**Figure 2.** ESI-MS spectra (Micromass LCT) of **(a)** SAM ( $M+H$ : 399) and **(b)** L- $^{13}\text{C}$ -methyl]-SAM ( $M+H$ : 400) generated as products after the conversion of 5'-FDA and either **(a)** L-methionine or **(b)** L- $^{13}\text{C}$ -methyl]-methionine, catalysed by the fluorinase in the reverse direction.

5-FDA (1 mM) and L-methionine (20 mM) or L- $^{13}\text{C}$ -methyl]-methionine (20 mM) were incubated with the fluorinase ( $1.4 \times 10^{-3}$  unit) in a phosphate buffer (20 mM) at pH 7.8. The spectrum was recorded after 12 hrs.

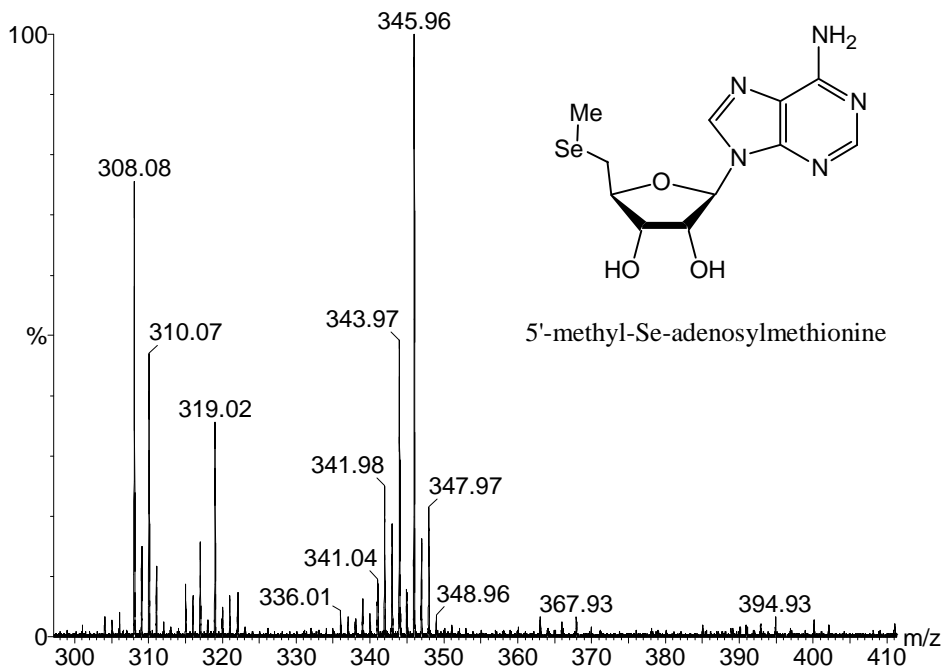

**Figure 3.** ESI-MS spectrum (Micromass LCT) of with the characteristic isotope signature of selenium catalysed by the fluorination enzyme from 5'-FDA and seleno-methionine.

ESI-MS spectra (Micromass LCT) of 5'-[MeSe]-SAM, (M+H: 345.96) generated as a product after the conversion of 5'-FDA and L-Se-methionine catalysed by the fluorinase in the reverse direction. 5'-FDA (1 mM) and L-Se-methionine (5 mM) were incubated with the fluorinase ( $1.4 \times 10^{-3}$  unit) in a phosphate buffer (20mM) at pH 7.8. The spectrum was recorded after 12 hrs.

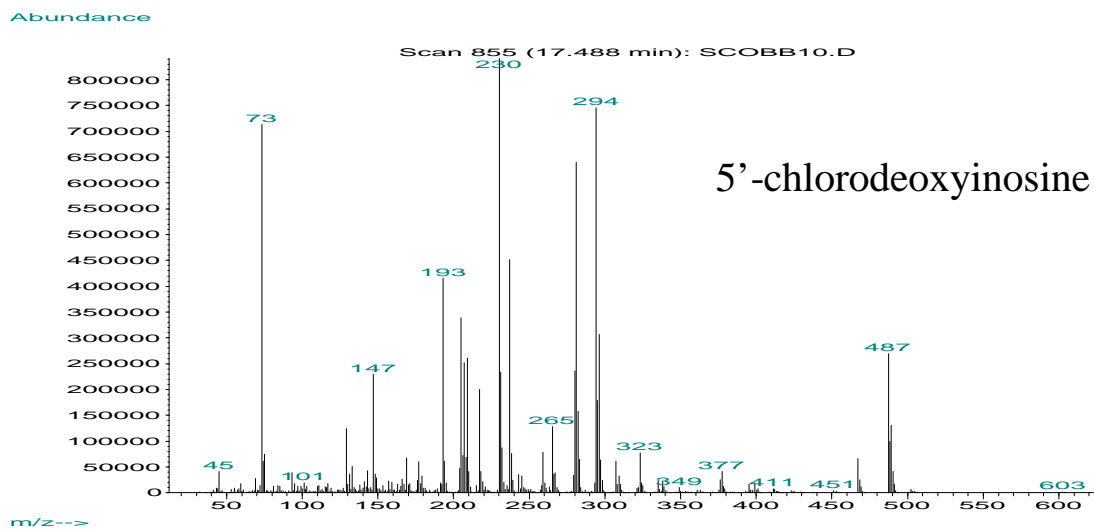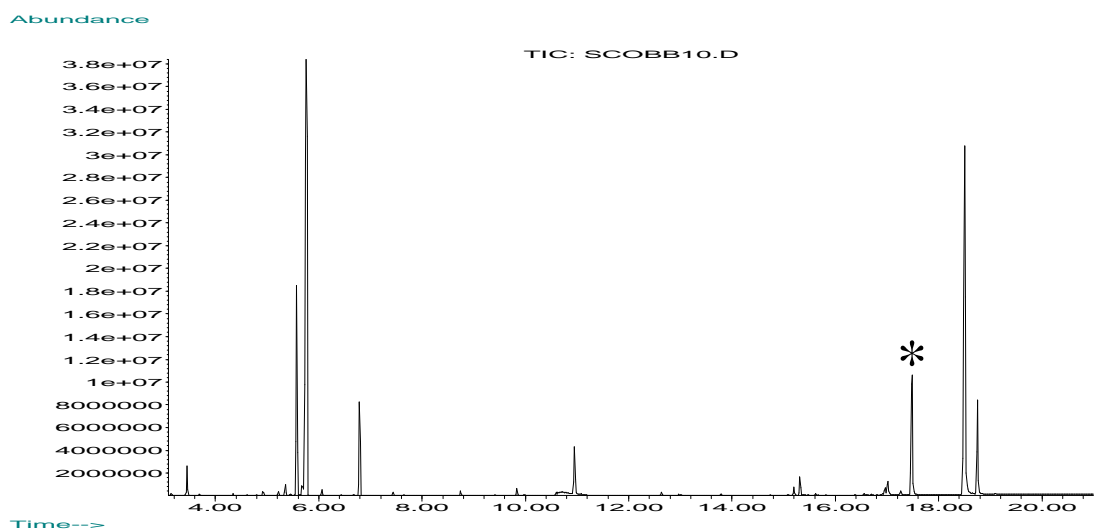

**Figure 4** GC/MS trace of the MSTFA derivative of 5'-CIDI

SAM (1mM), chloride ion (20 mM), fluorinase ( $1.4 \times 10^{-3}$  unit) and adenosyl acid deaminase (0.05 unit) were incubated in a phosphate buffer at pH 7.8. The spectrum was recorded after 12 h.  $m/z$  487 (M -CH<sub>3</sub>, 31%), 294 (M C<sub>8</sub>H<sub>11</sub>N<sub>4</sub>OSi, 88) and 230 (230).

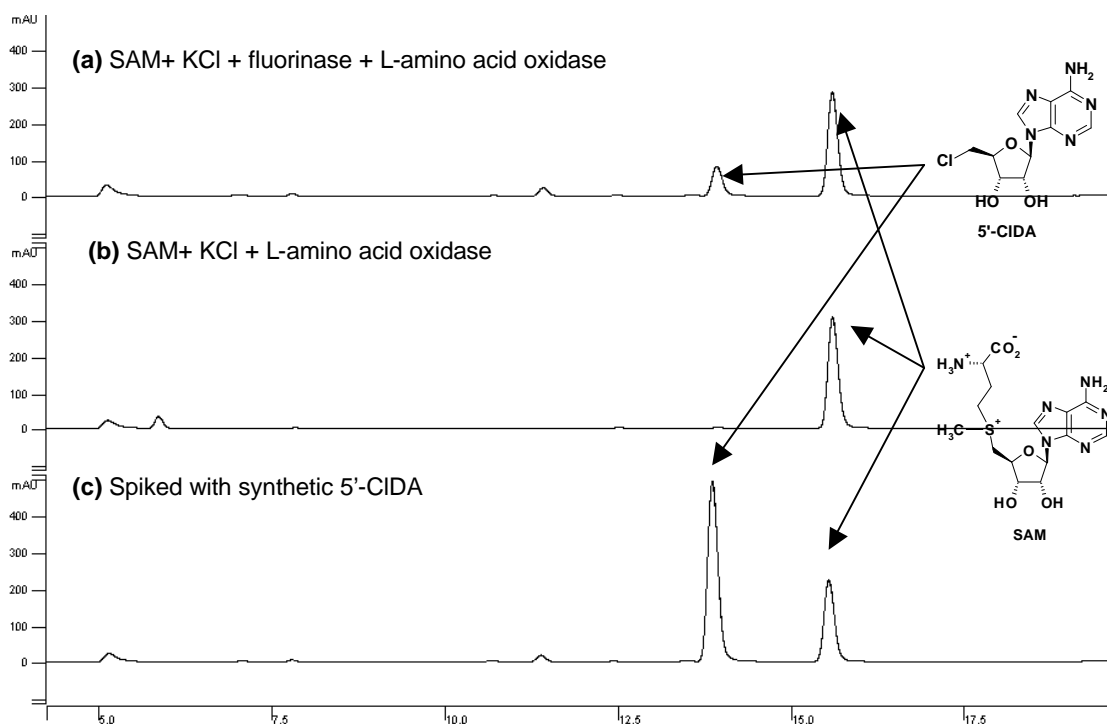

**Figure 5 HPLC profiles after running the fluorinase reaction with and without the oxidase**

SAM (1mM), chloride ion (20 mM), fluorinase ( $1.4 \times 10^{-3}$  unit) and L-amino acid oxidase (ca. 0.03 unit) were incubated in a phosphate buffer (20mM) at pH 7.8. Each chromatogram was recorded after 12 hrs. (a) is the result of the fluorinase and amino acid oxidase combination, showing 5'-CIDA production, (b) is a control without fluorinase and (c) is the product of chromatogram (a) spiked with synthetic 5'-CIDA. The small peak at 11.5 minutes is 5'-chloro-5'-deoxyinosine (2'-CIDI) arising from a low level of deaminase activity in the amino acid oxidase.

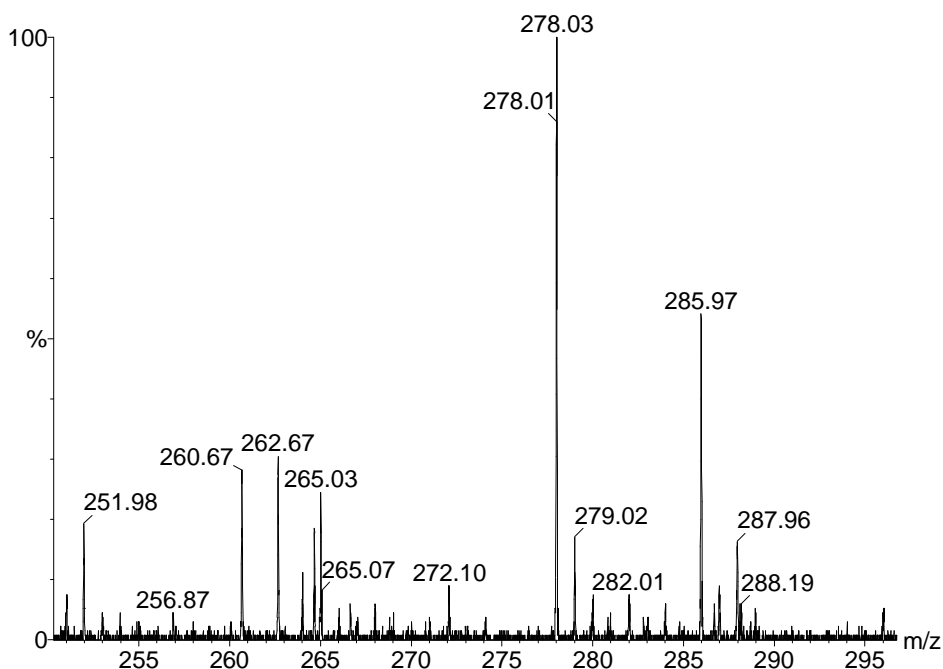

**Figure 6** ESI-MS spectra (Micromass LCT) of 5'-CIDA, (M+H:  $^{35}\text{Cl}$  = 285.97,  $^{37}\text{Cl}$  = 287.96) generated as a product after the combination of SAM and chloride ion catalysed by the fluorinase and in combination with the L-amino acid oxidase.

SAM and chloride ion were incubated in a phosphate buffer at pH 7.8 and at a final concentration of 1 mM for SAM and 20 mM for chloride ion. The fluorinase was added at 6 (mg/ml) and the oxidase at 2 mg/ml. The spectrum was recorded after stopping the reaction after 12 hours.



## Crystal Data collection parameters

|                                         |                                       |
|-----------------------------------------|---------------------------------------|
| Data collection                         | 5'Cl-FDA                              |
| Wavelength (Å)                          | 0.933                                 |
| Resolution<br>(Highest Shell,<br>Å)     | 45-2.0<br>(2.11 -2.0)                 |
| Space group                             | C222 <sub>1</sub>                     |
| Cell constants<br>(Å)                   | a= 75.5Å b = 129.2<br>Å<br>c= 183.1 Å |
| Unique<br>reflections                   | 56675 (8767)                          |
| Average<br>redundancy                   | 4.7 (4.8)                             |
| I/s                                     | 13.6 (2.4)                            |
| Completeness<br>(%)                     | 98 (100)                              |
| R <sub>merge</sub> (%)                  | 9.5 (45.4)                            |
| <b>Refinement</b>                       |                                       |
| R                                       | 19.0 (25.4)                           |
| R <sub>free</sub>                       | 24.7 (33.3)                           |
| rmsd bonds (Å) /<br>angles (°)          | 0.009 / 1.21                          |
| Residues in<br>Ramachandran<br>Core (%) | 87%                                   |
| PDB accession<br>code                   | 2c2w                                  |

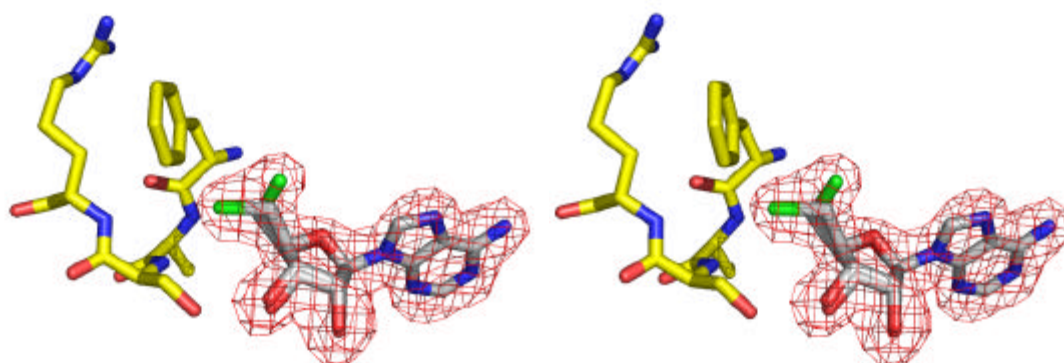

**Figure 7** The unbiased Fo-Fc electron density for 5Cl-FDA. Both conformation of the chlorine atom are visible.

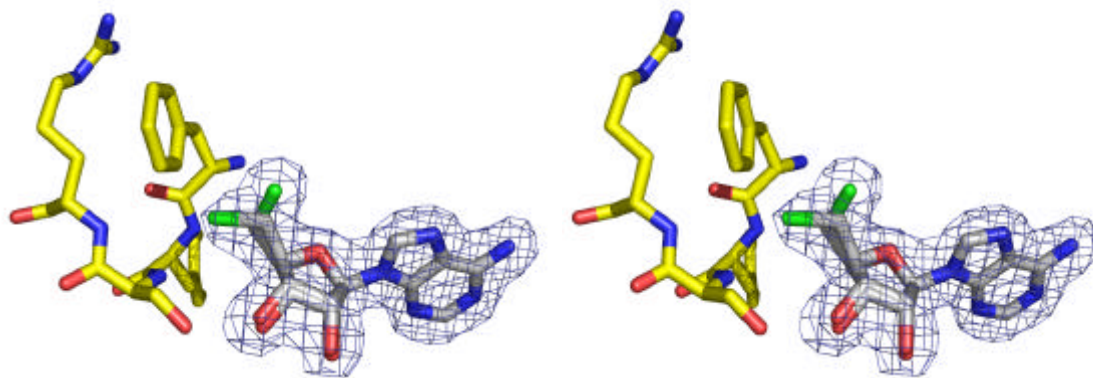

**Figure 8** The final 2Fo-Fc electron density for 5Cl-FDA. Both conformation of the chlorine atom are visible.
